# Supplementary material
Source: publisher figshare collection journal article supplement (https://acs.figshare.com/ndownloader/files/4535626)

---

## Supporting Information.

**Figure S1.** SEM images of the prepared ZnO in solution of  $0.01 \text{ mol}\cdot\text{L}^{-1} \text{ Zn}(\text{Ac})_2 + 50\%$  DMSO with a current density of  $0.5 \text{ mA}\cdot\text{cm}^{-2}$  for 60 min at  $70^\circ\text{C}$

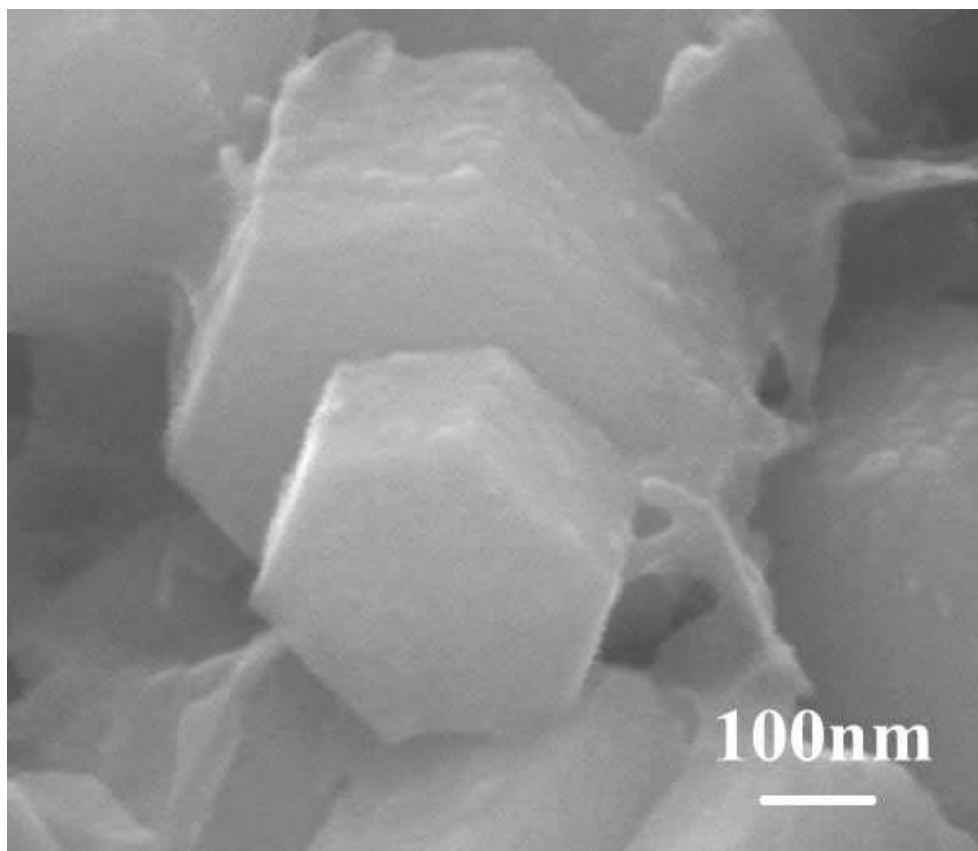

---

**Figure S2.** SEM images of the prepared ZnO in solution of  $0.01 \text{ mol}\cdot\text{L}^{-1} \text{ Zn}(\text{Ac})_2 + 50\%$  DMSO with a current density of  $0.5 \text{ mA}\cdot\text{cm}^{-2}$  for 60 min at  $90^\circ\text{C}$ .

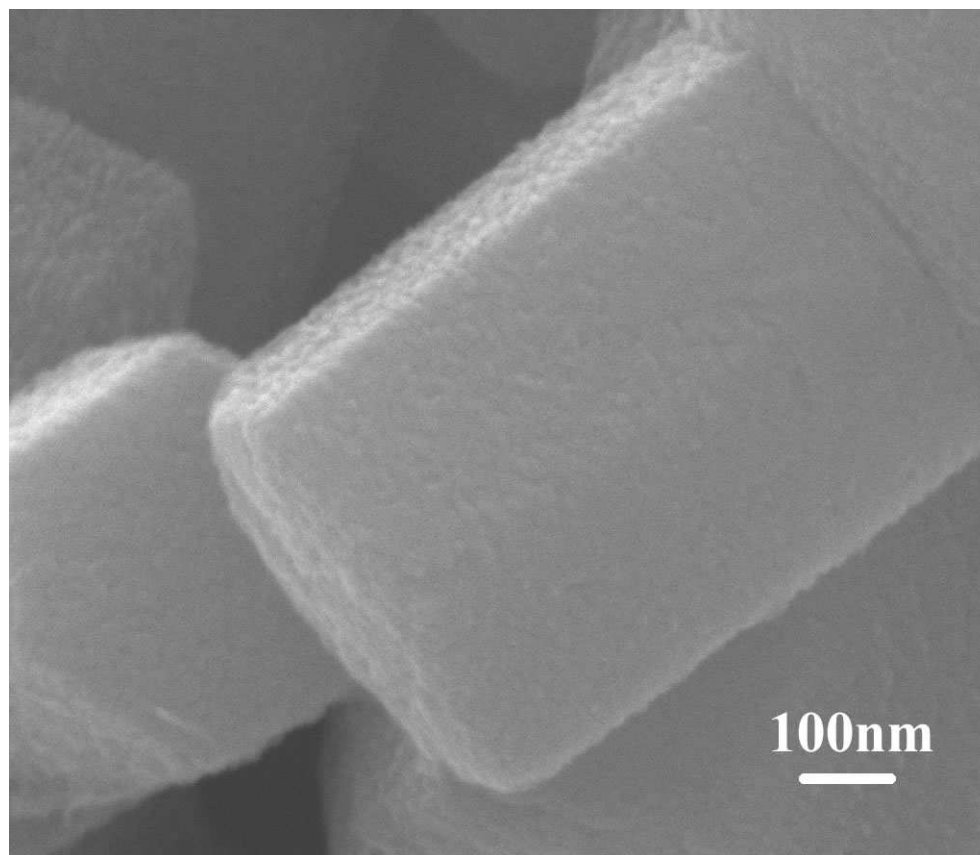

---

**Figure S3.** SEM images of the prepared ZnO in solution of  $0.01 \text{ mol}\cdot\text{L}^{-1} \text{ Zn}(\text{Ac})_2 + 50\%$  DMSO with a current density of  $0.5 \text{ mA}\cdot\text{cm}^{-2}$  for 240 min at  $70^\circ\text{C}$

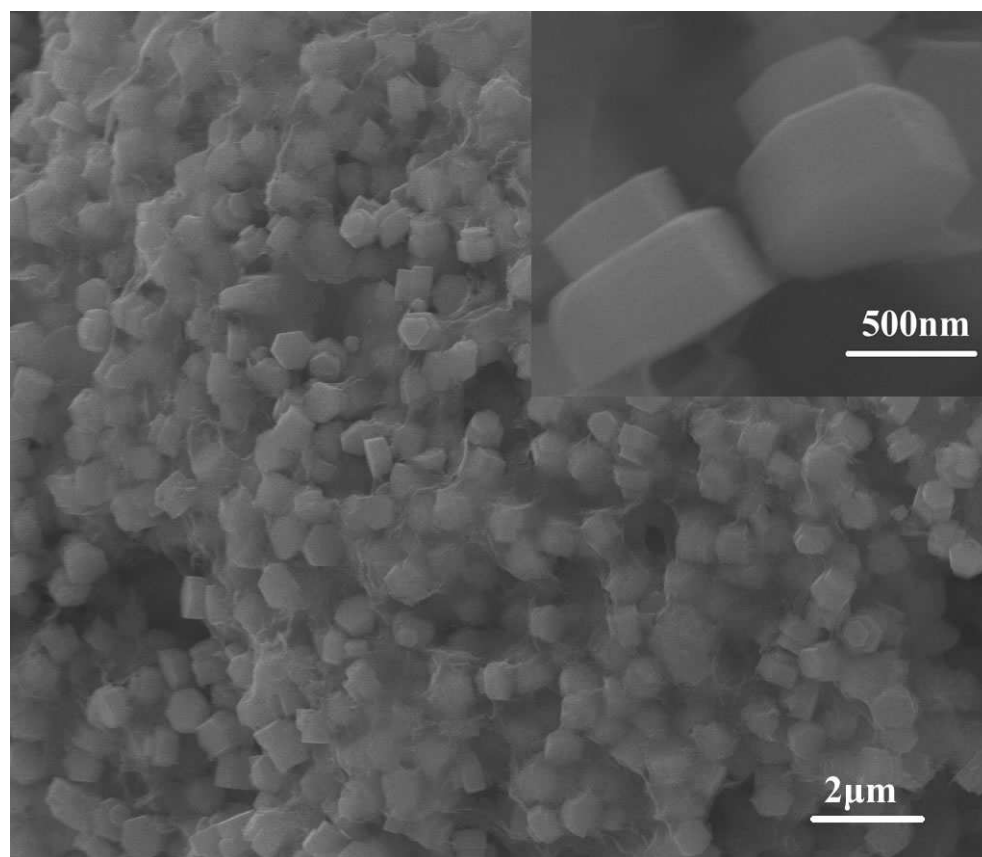

Supplement: Supplementary file 1 [file 4535626]
